# Supplementary material
Source: HighWire-hosted journal article supplement (doi:10.1101/rna.079206.122)

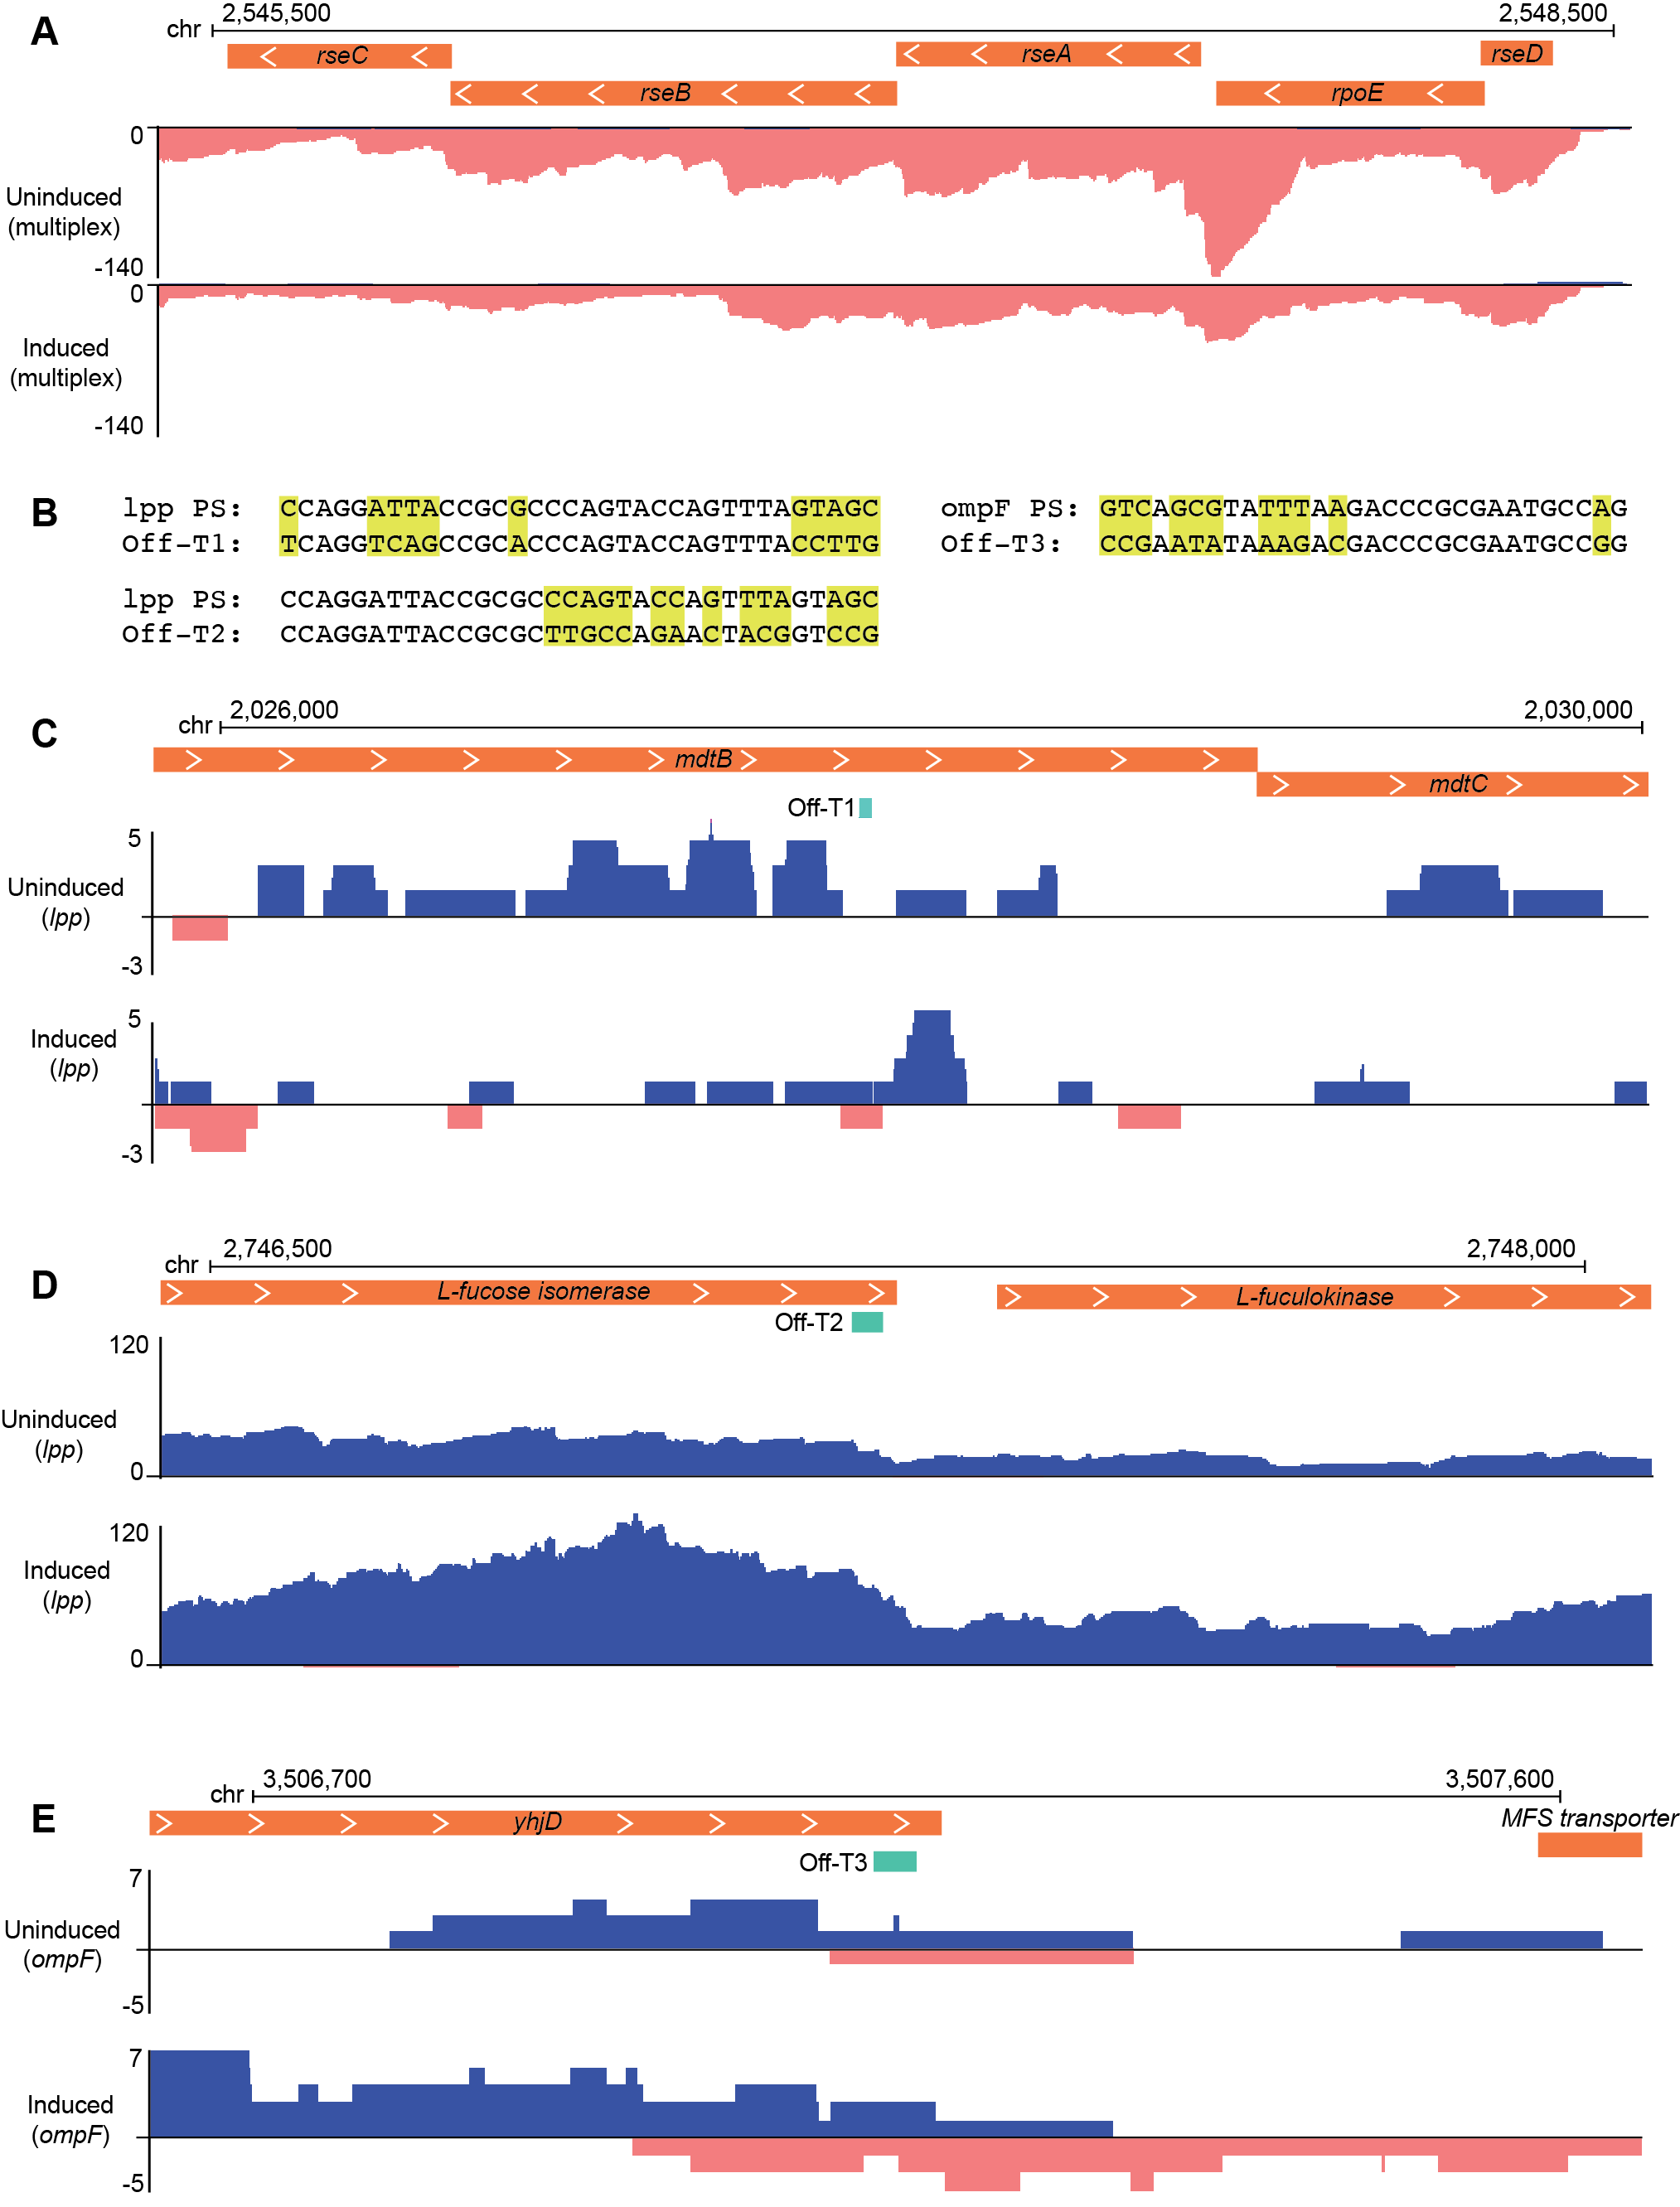


**Supplemental Figure S3**. RNAseq analysis of potential off-target genes. (**A**) Genome browser tracks show stranded total RNAseq read density over selected regions of the host (*E. coli*) chromosome. Reads aligned to the top strand are colored blue; bottom strand, pink. Orange bars indicate ORFs for potential off-target genes. The x-axis indicates cumulative read depth. Inducing type IIIA crRNP expression led to reduced coverage across the operon. (**B**) Three regions with partial matches to designed crRNA were identified; alignments between the designed spacer and the partial match are shown, mismatches are highlighted in yellow. (**C**-**E**) Representative RNAseq tracks are shown for three genes containing partial matches as identified in B. Teal bars show positions of the partial match protospacer for *mdtB* (**C**), *L-fucose isomerase* (**D**), and *yhjD* (**E**).


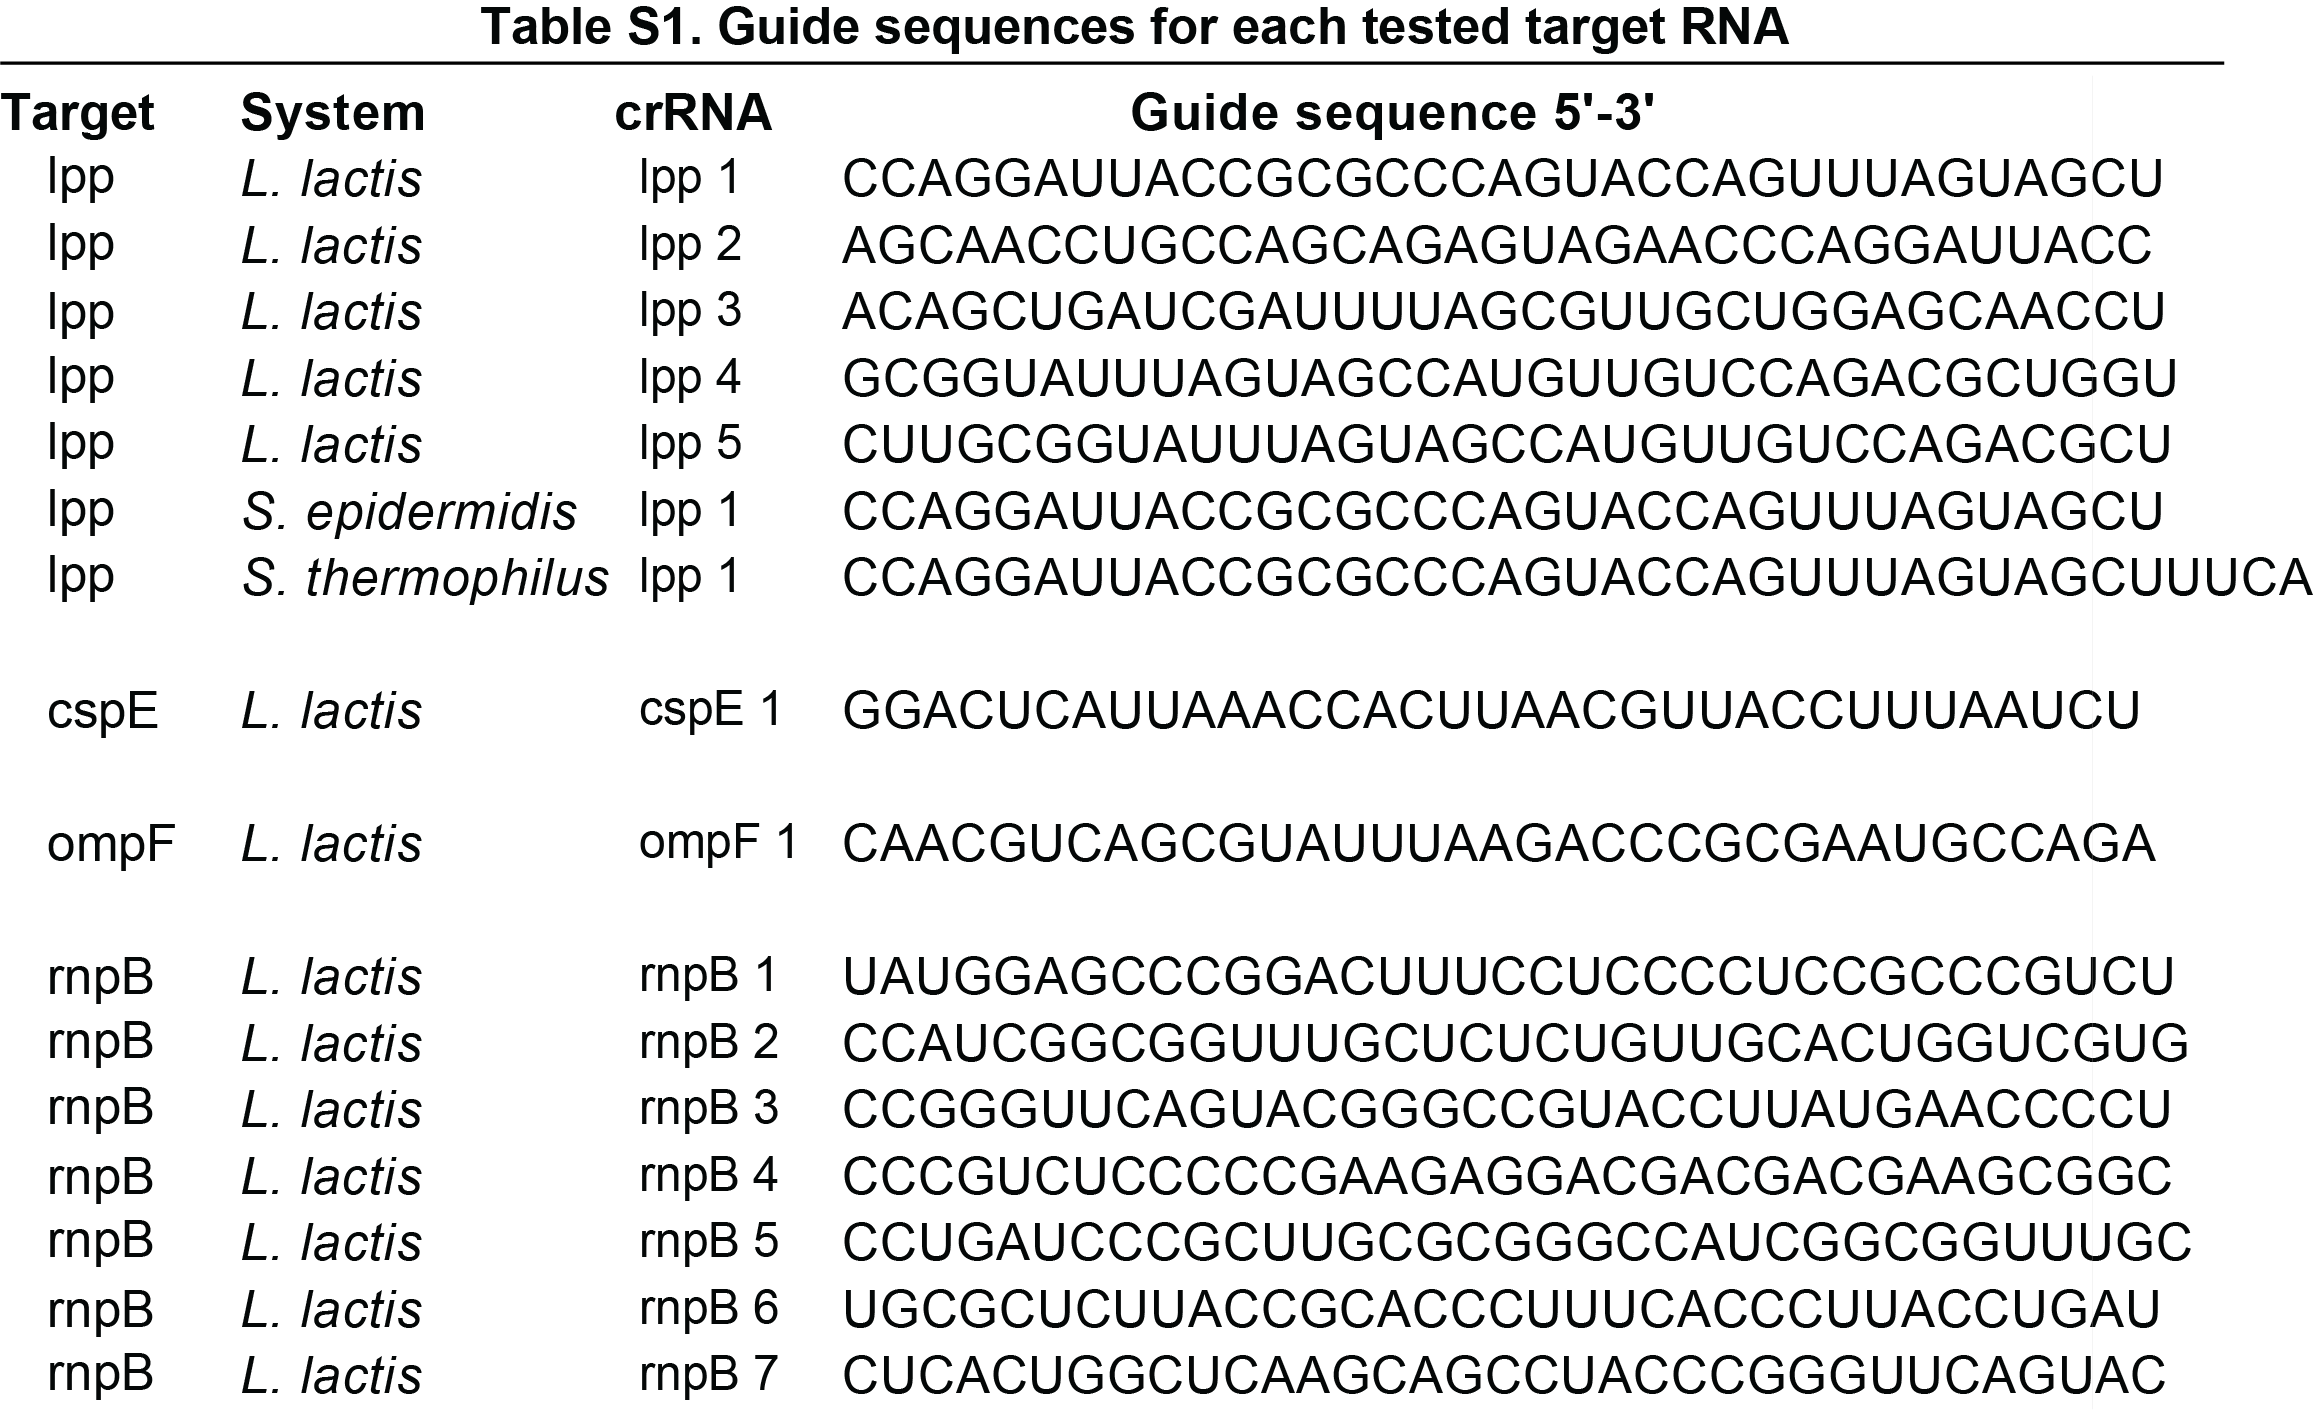


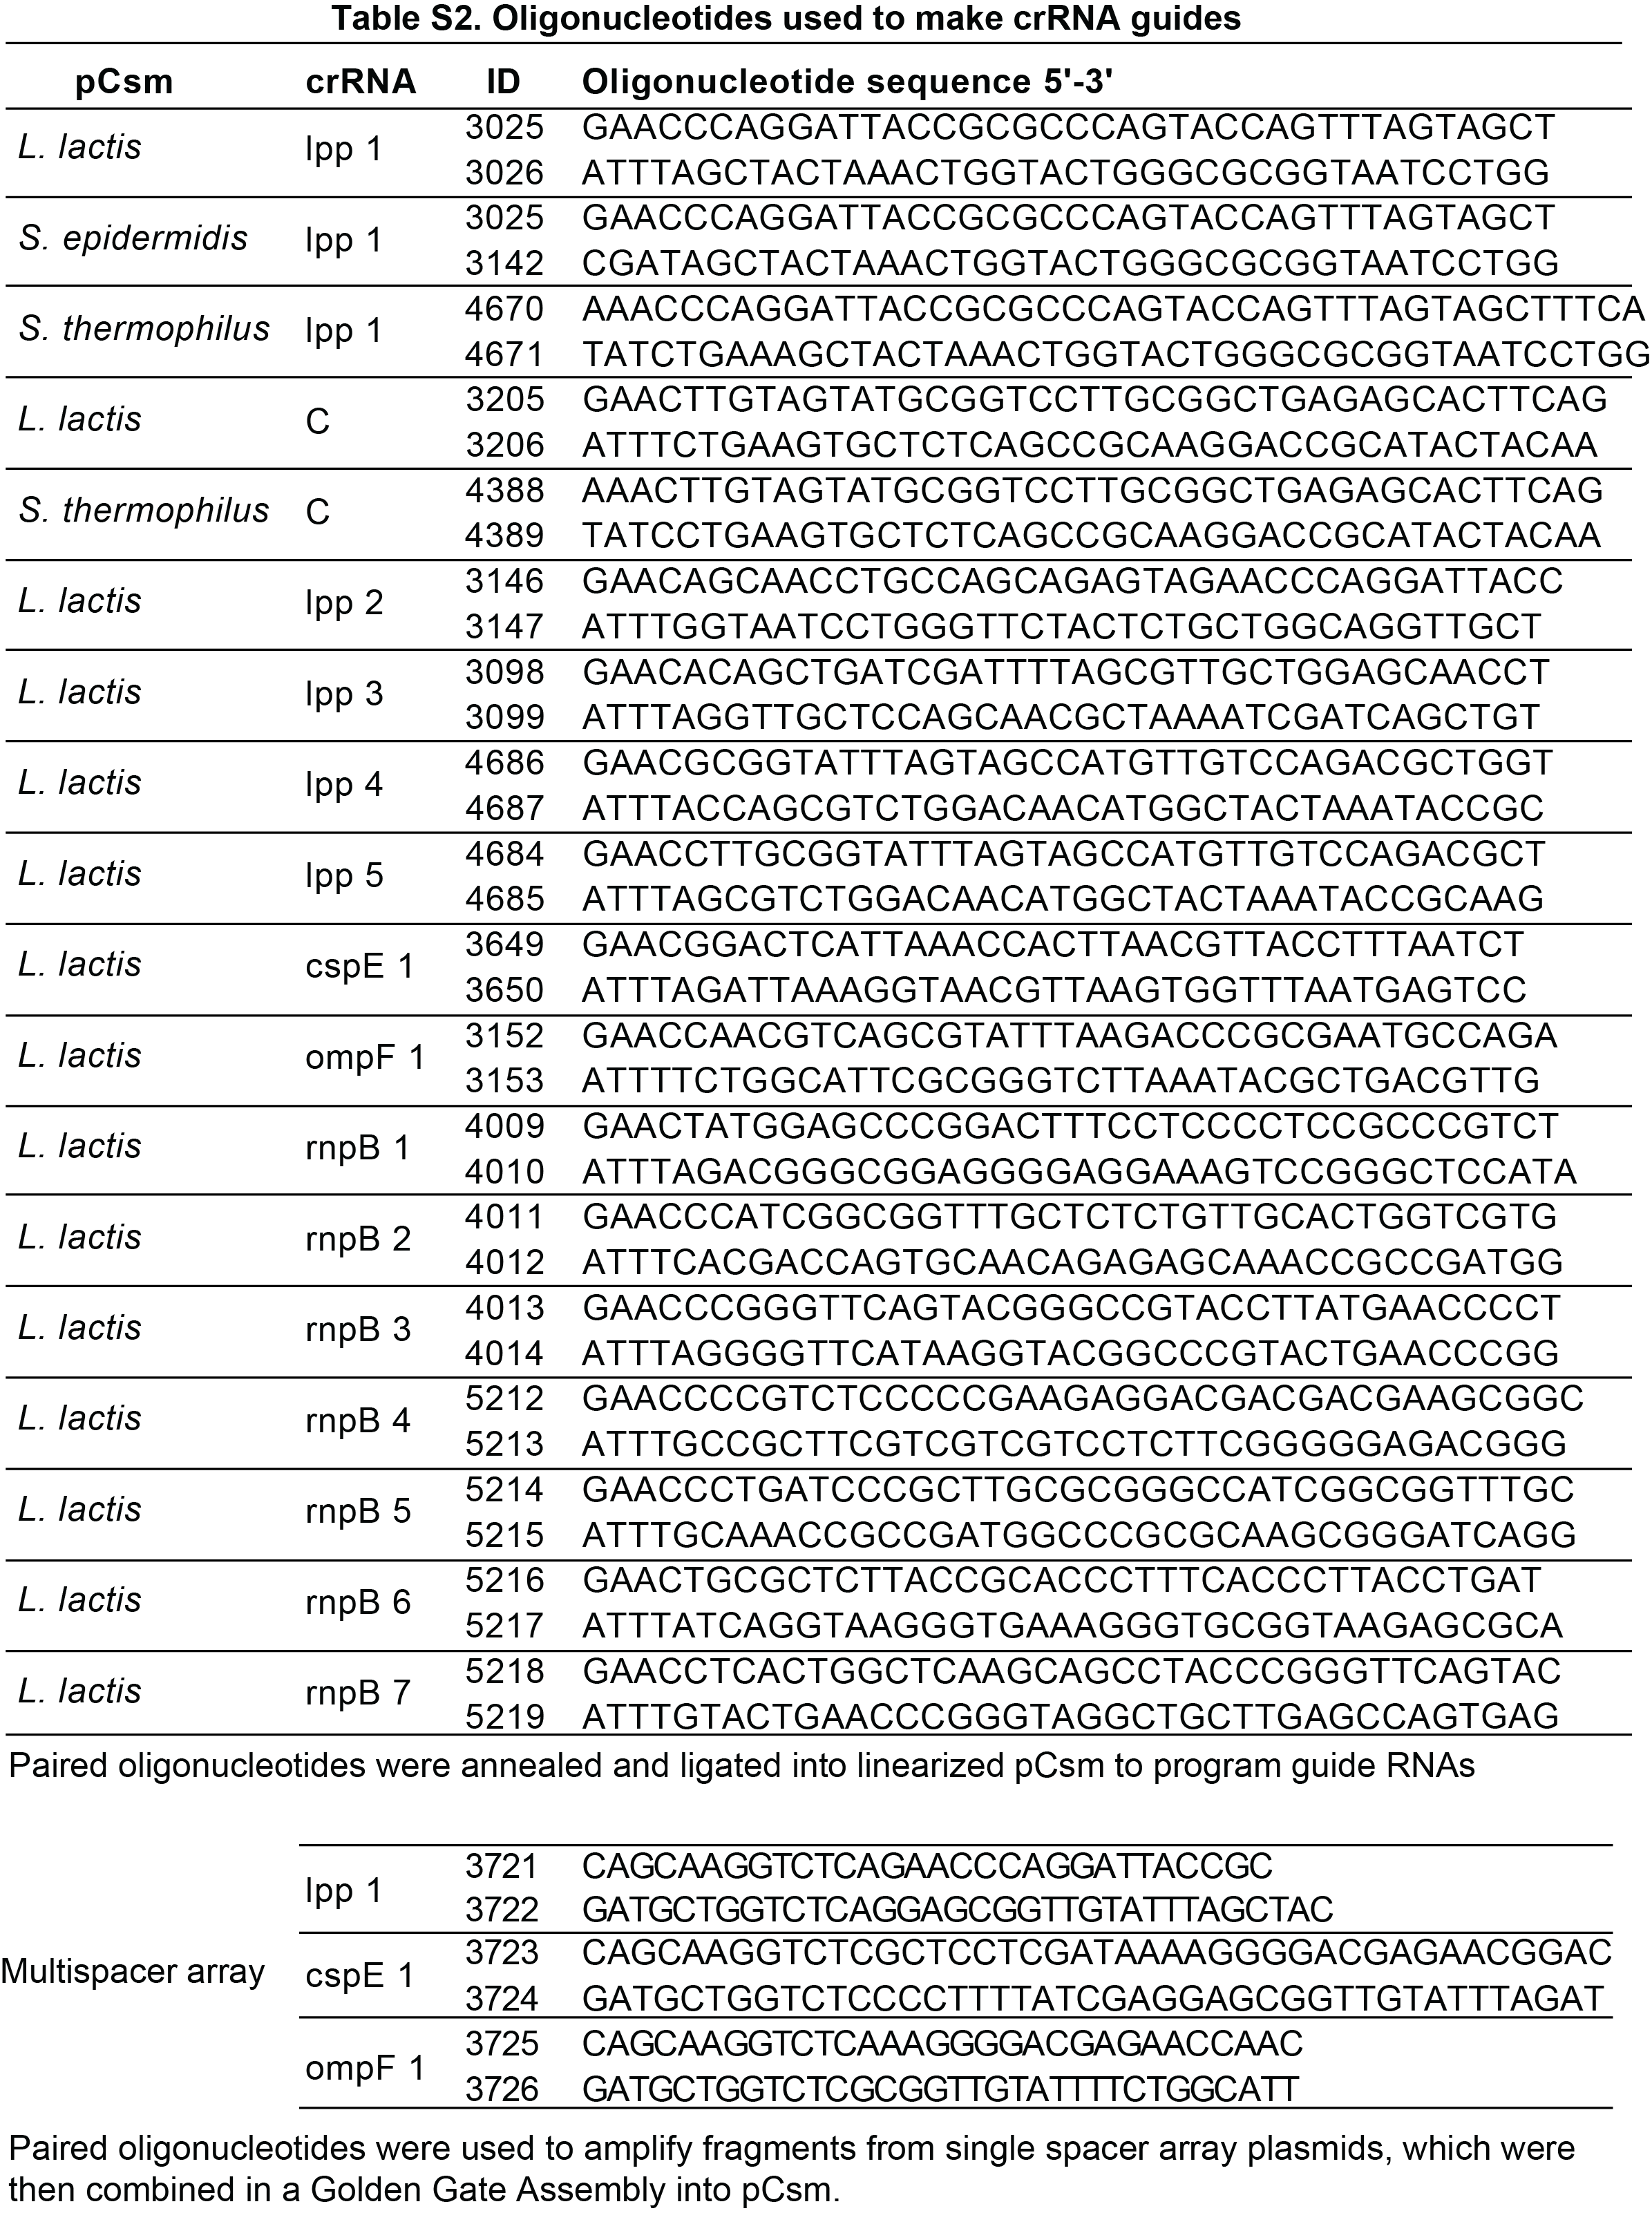


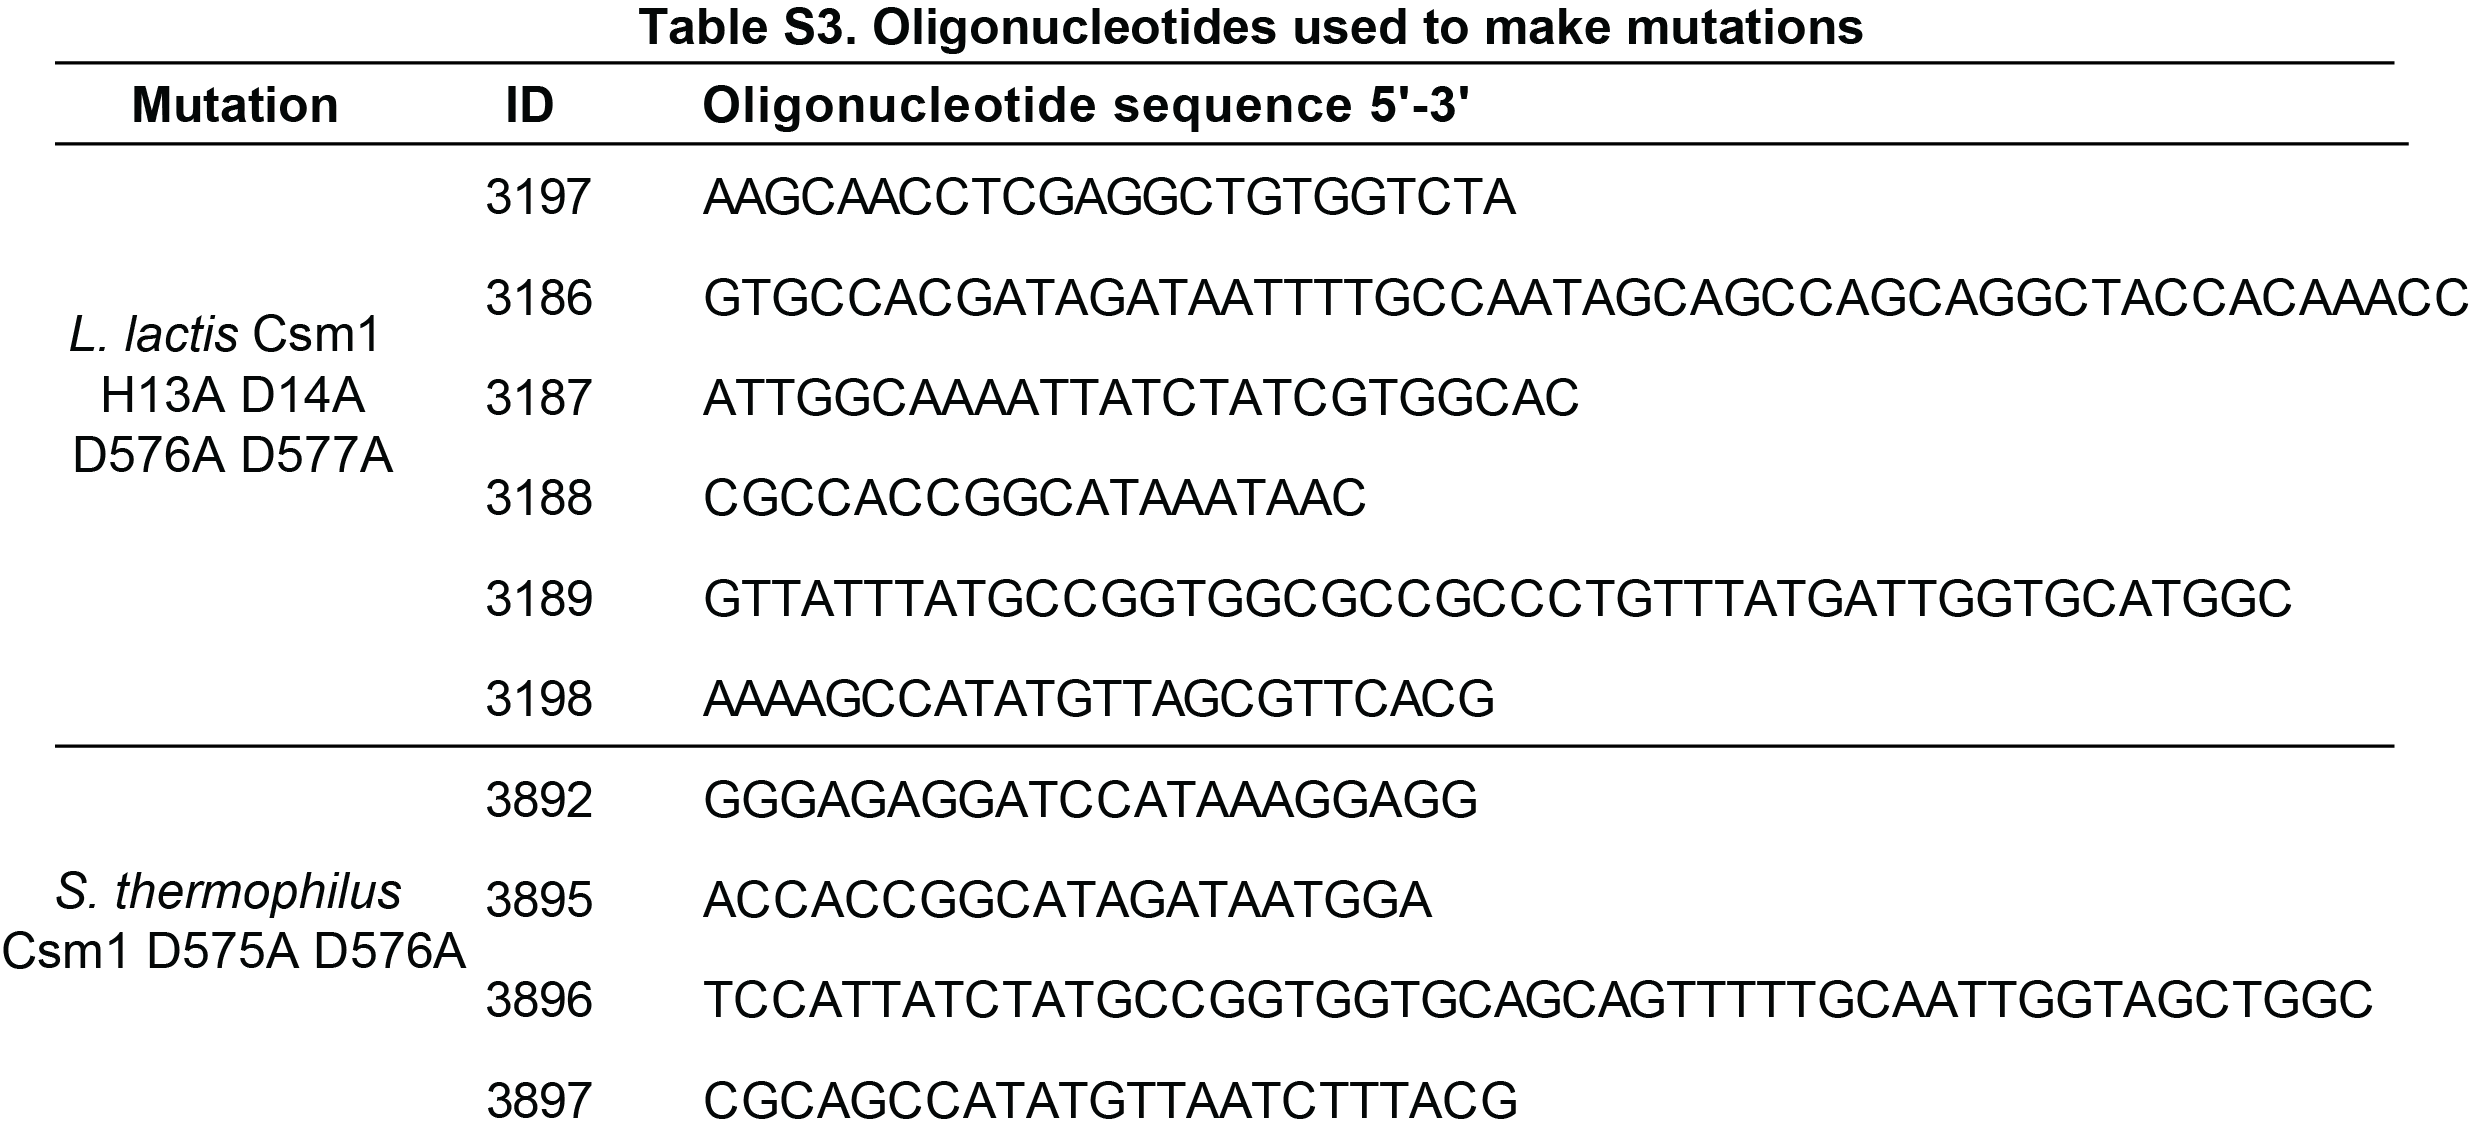


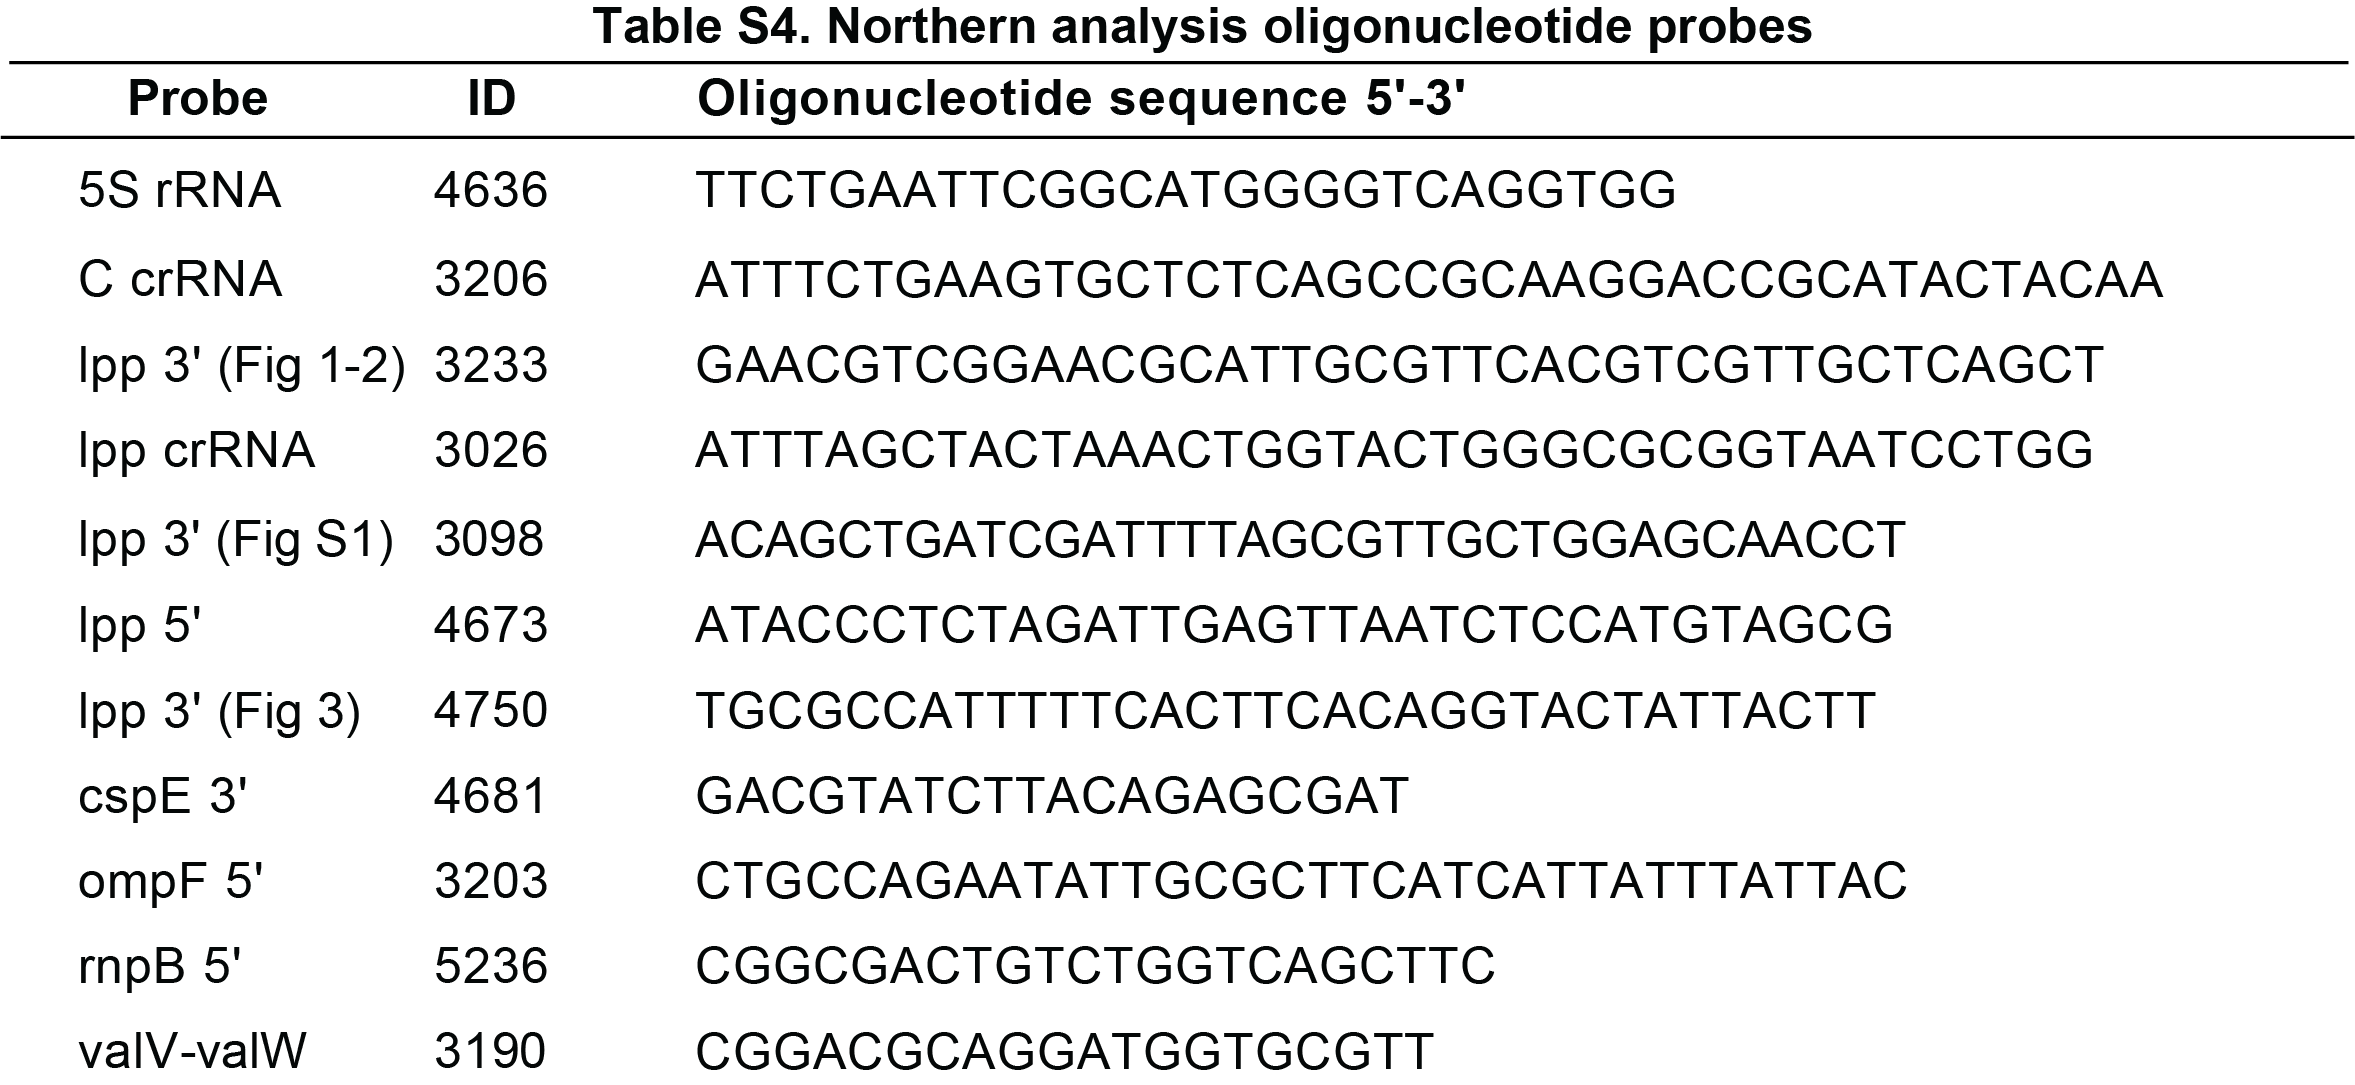


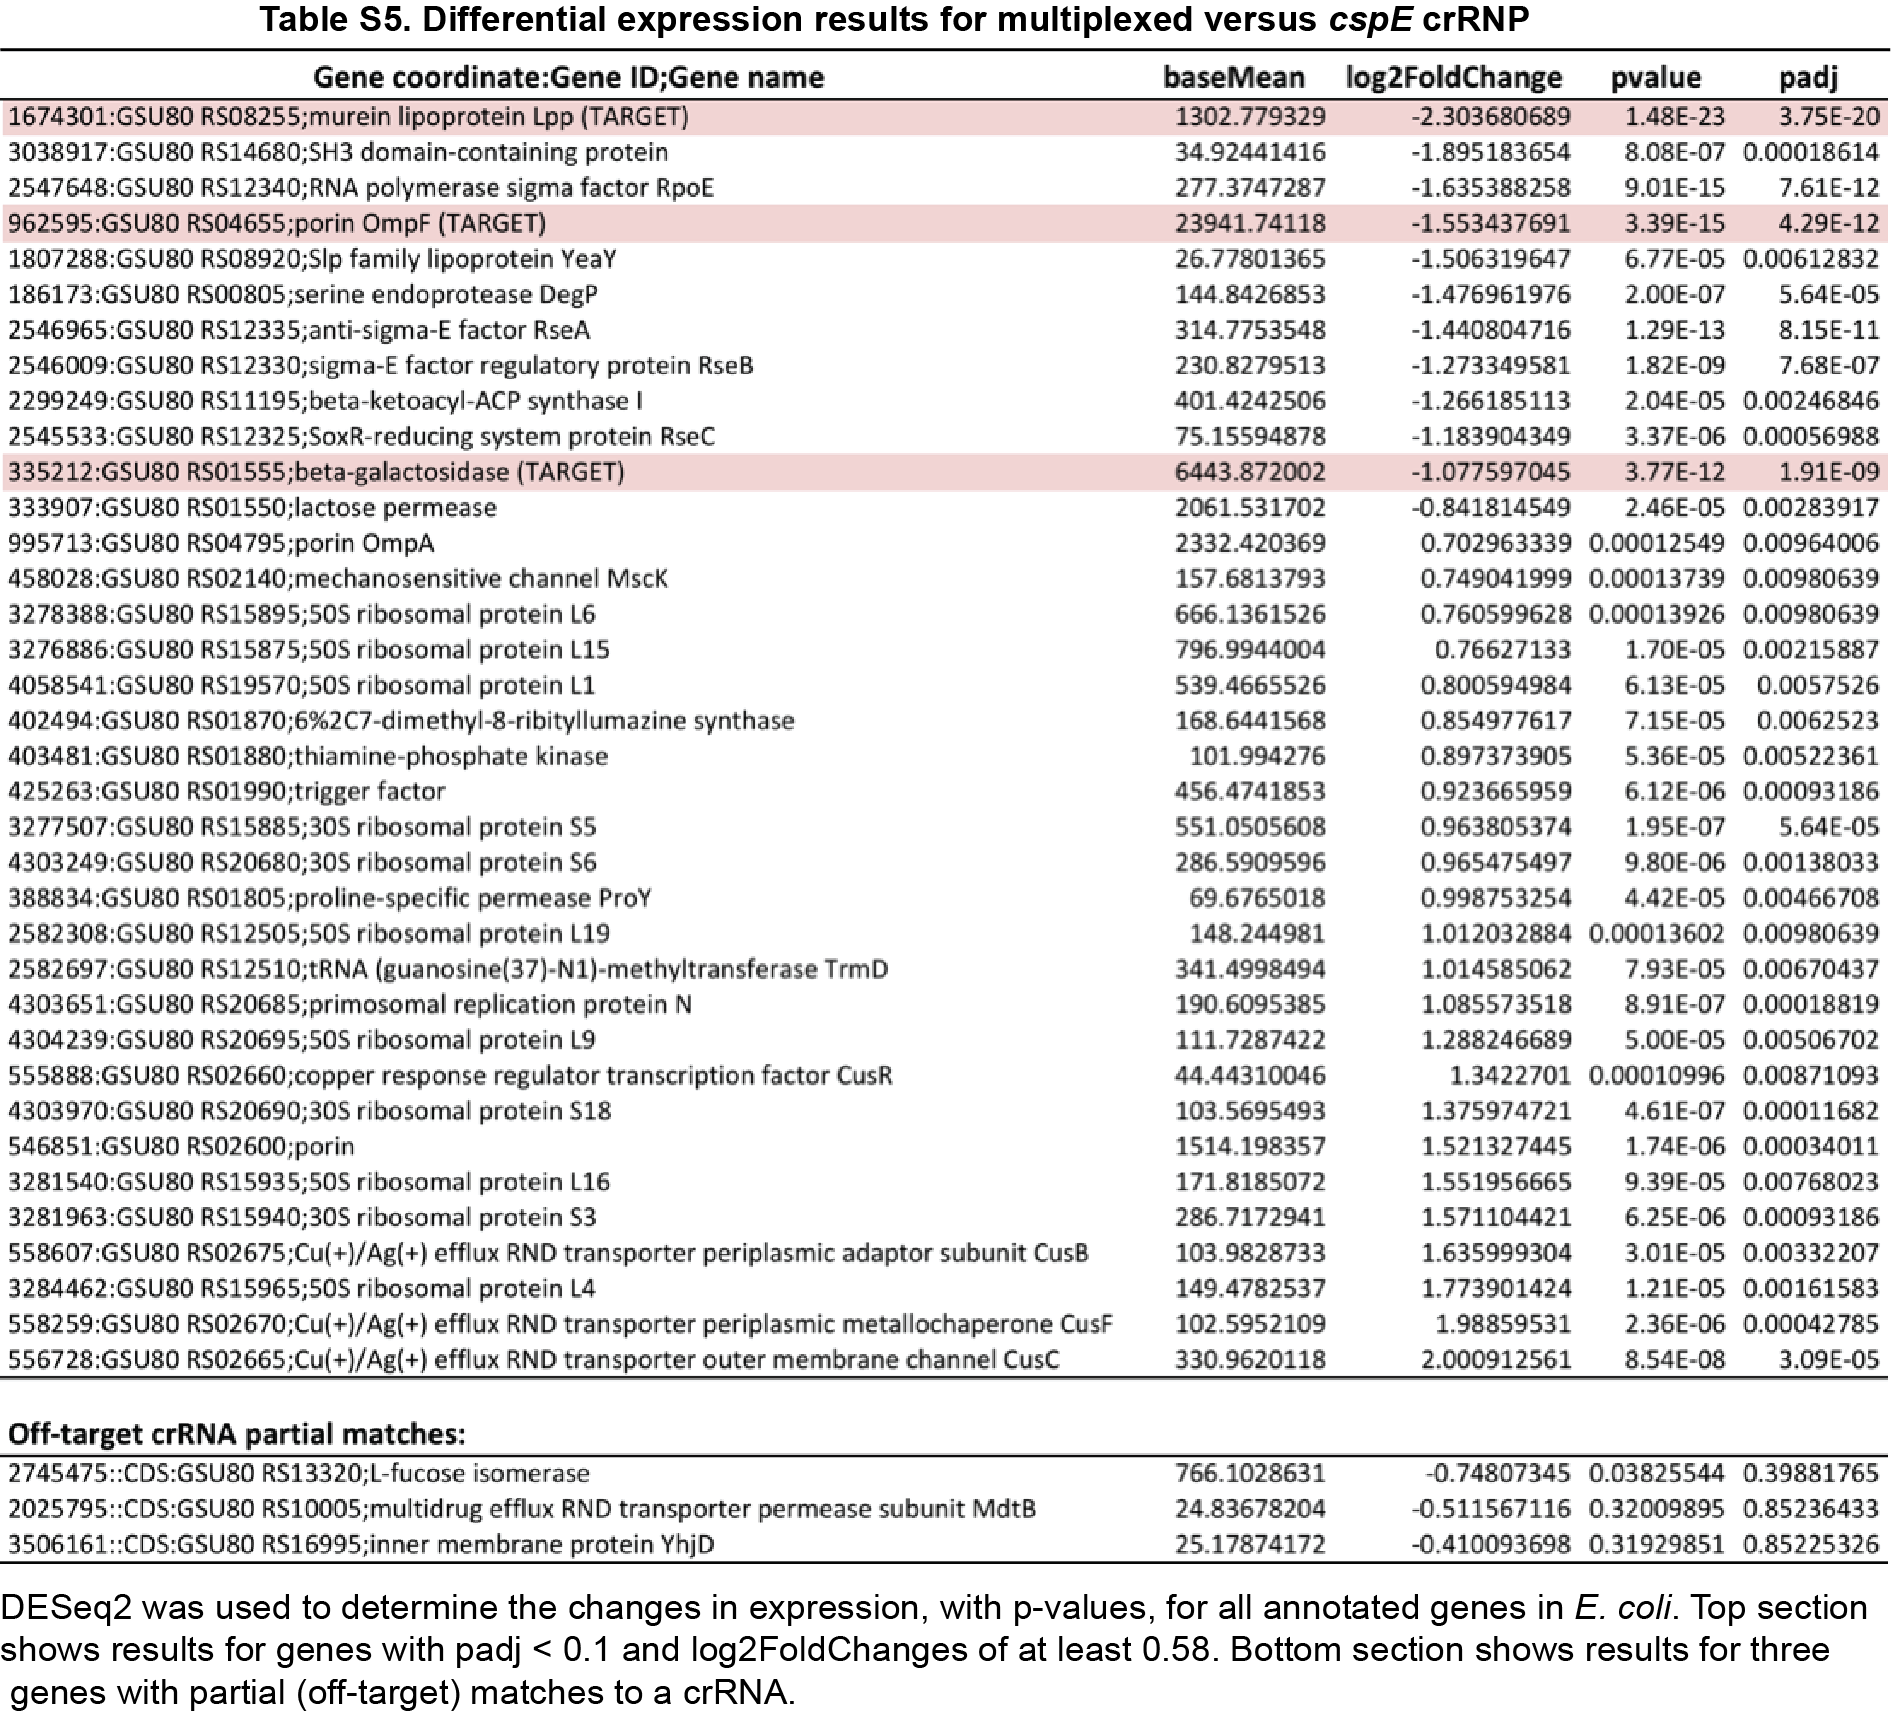

Supplement: Supplemental_Material.docx [file Supplemental_Material.docx]
